1 **Characterization of the Novel Mitochondrial Genome Replication Factor**  
2 **MiRF172 in *Trypanosoma brucei***

3

4 Simona Amodeo<sup>1,2</sup>, Martin Jakob<sup>1</sup>, Torsten Ochsenreiter<sup>1\*</sup>

5

6

7

8 <sup>1</sup> Institute of Cell Biology, University of Bern, Switzerland

9 <sup>2</sup> Graduate School for Cellular and Biomedical Sciences, University of Bern, Switzerland

10 \* Corresponding author

11 E-mail: torsten.ochsenreiter@izb.unibe.ch

12

13

14

15 **Keywords**

16

17 maxicircles, minicircles, **Minicircle Replication Factor 172**, mitochondrial DNA replication, tripartite  
18 attachment complex (TAC), *Trypanosoma brucei*

19

20

21

22 **Summary Statement**

23

24 MiRF172 is a novel protein involved in the reattachment of replicated minicircles in *Trypanosoma*  
25 *brucei*, which requires the mitochondrial segregation machinery for proper localization.

26 **Abstract**

27

28 The unicellular parasite *Trypanosoma brucei* harbors one individual mitochondrial organelle with a  
29 singular genome the kinetoplast DNA or kDNA. The kDNA largely consists of concatenated  
30 minicircles and a few maxicircles that are also interlocked into the kDNA disc. More than 30 proteins  
31 involved in kDNA replication have been described, however several mechanistic questions are only  
32 poorly understood. Here, we describe and characterize MiRF172, a novel mitochondrial genome  
33 replication factor, which is essential for proper cell growth and kDNA maintenance. Using super-  
34 resolution microscopy, we localize MiRF172 to the antipodal sites of the kDNA. We demonstrate that  
35 depletion of MiRF172 leads to continuous loss of mini- and maxicircles during the cell division cycle.  
36 Detailed analysis suggests that MiRF172 is likely involved in the reattachment of replicated minicircles  
37 to the kDNA disc. Furthermore, we provide evidence that the localization of the replication factor  
38 MiRF172 not only depends on the kDNA itself, but also on the mitochondrial genome segregation  
39 machinery suggesting a tight interaction between the two essential entities.

## 40 **Introduction**

41

42 One of the most intriguing genome organizations can be found in the mitochondrial genome of  
43 Kinetoplastea a class of single celled eukaryotes. The name Kinetoplastea refers to the organism's  
44 single mitochondrial genome (kinetoplast DNA, kDNA) that in most cases is positioned close the base  
45 of the flagellum. The position reflects the physical connection between the base of the flagellum and  
46 the kDNA by a structure called the tripartite attachment complex (TAC) as has been demonstrated in  
47 *Trypanosoma brucei* (Ogbadoyi, 2003). Several components of this structure have now been identified  
48 that elute to a rather complex organization of the segregation machinery (Gheiratmand et al., 2013;  
49 Käser et al., 2016; Käser et al., 2017; Schnarwiler et al., 2014; Trikin et al., 2016; Zhao et al., 2008).

50 The mitochondrial genome itself is composed of small and larger plasmid like elements referred to as  
51 the mini- and maxicircles, respectively. Maxicircles (23 kb, in *T. brucei*) are the functional homologues  
52 of other mitochondrial genomes and encode 18 protein coding genes and two ribosomal RNA genes.  
53 The majority of the mitochondrial genes are cryptic and require posttranscriptional editing to code for  
54 the *bona fide* components of the respiratory chain and a ribosomal protein (Hajduk and Ochsenreiter,  
55 2010; Jensen and Englund, 2012; Povelones, 2014). The editing process is mediated by large protein  
56 complexes (Aphasizheva and Aphasizhev, 2016; Göringer, 2012; McDermott et al., 2016) and small  
57 non-coding guide RNAs (gRNAs) that are transcribed from the minicircles, which in *T. brucei* are 1  
58 kilo base (kb) in size and each of them code for three to five gRNAs (Hajduk and Ochsenreiter, 2010;  
59 Hong and Simpson, 2003; Ochsenreiter et al., 2007). Each *T. brucei* cell contains a single mitochondrion  
60 with one kDNA. The kDNA is made up of 5000 minicircles with several hundred different minicircle  
61 classes, and 25 maxicircles (23 kb), which are virtually identical. Each minicircle is physically  
62 connected to three other minicircles and the maxicircles are interwoven in the minicircle network (Chen  
63 et al., 1995). Overall the kDNA resembles a chain mail and is organized likely through several histone  
64 like proteins (Lukeš et al., 2001; Xu et al., 1996) in a disc like structure about 450nm in diameter and  
65 150nm in height (Jakob et al., 2016). Similar to the overall structure, replication of the kDNA is  
66 complex and some estimate up to 150 proteins to be involved in this process (Jensen and Englund,  
67 2012). The current replication model suggests that the minicircles are released from the network into  
68 the kinetoflagellar zone (KFZ), the region between the kinetoplast and the inner mitochondrial  
69 membrane (Drewa and Englund, 2001; Jensen and Englund, 2012). Here replication is initiated and  
70 proceeds unidirectionally via theta intermediates leading to two nicked / gapped minicircles that are  
71 then transported to the antipodal sites via an unknown mechanism (Jensen and Englund, 2012;  
72 Povelones, 2014). The antipodal sites are ill defined protein complexes at opposing sites of the kDNA  
73 disc. Within these sites partial gap repair occurs and the minicircles are reattached to the kDNA network  
74 by a Topoisomerase type II enzyme (Wang et al., 2000). The newly replicated and reattached  
75 minicircles maintain at least one gap each until the networks are separated. The repair of the gaps (and

76 nicks) is likely mediated by the mitochondrial ligase LigK alpha (Downey et al., 2005) and the  
77 mitochondrial polymerase Pol beta PAK (Saxowsky et al., 2003). After, the duplicated kDNA is  
78 segregated by the separating basal bodies that are connected to the kDNA via the TAC structure  
79 (Ogbadoyi, 2003). Several core components of the three regions of the TAC have now been identified:  
80 p197 and TAC65 in the exclusion zone filaments (EZF) (Gheiratmand et al., 2013; Käser et al., 2016),  
81 TAC40 in the outer mitochondrial membrane (Schnarwiler et al., 2014), p166 at the inner mitochondrial  
82 membrane (Zhao et al., 2008) and TAC102 in the unilateral filaments (ULF) (Trikin et al., 2016). We  
83 have now also elucidated the hierarchy of the TAC complex and its assembly demonstrating that the  
84 structure is built *de novo* from the basal body towards the kDNA and that TAC102 is currently the  
85 kDNA most proximal TAC protein, while p197 is closest to the basal body (Hoffmann et al., 2017).

86

87 Here we present data characterizing the **Minicircle Replication Factor 172** (MiRF172; Tb927.3.2050)  
88 as a kDNA associated protein essential for proper growth and kDNA maintenance in *T. brucei*. We also  
89 demonstrate that MiRF172 is likely involved in the reattachment of replicated minicircles to the kDNA  
90 disc. Further we demonstrate that localization of MiRF172 partially depends on the TAC and not only  
91 on the kDNA, suggesting a tight interaction between replication and segregation machinery.

## 92 **Results**

93

94 MiRF172 is a hypothetical conserved very basic (pI 9.5), large (172 kDa) protein with a predicted  
95 mitochondrial targeting sequence at the N-terminus (Fig. 1B). MiRF172 has been detected in several  
96 proteomics studies (i) supporting its mitochondrial localization (Peikert et al., 2017; Zhang et al., 2010),  
97 (ii) showing its developmental regulation (Gunasekera et al., 2012) and (iii) indicating a possible  
98 phosphorylation site at S999 (Urbaniak et al., 2013). The gene including its position in the genome is  
99 conserved throughout the currently sequenced Kinetoplastea (Fig. 1A). The protein contains a poly-Q  
100 stretch and an alanine-lysine rich region, both of which are found in the C-terminal part (Fig. 1B). While  
101 the poly-Q stretch is only conserved among the Trypanosoma species, the alanine-lysine rich region is  
102 conserved throughout the Kinetoplastea.

103

### 104 **MiRF172 protein localizes at the kDNA**

105 To localize the MiRF172 protein, we tagged it *in situ* at the C-terminus with a PTP epitope tag in blood  
106 stream form (BSF) and with HA in procyclic form (PCF) *T. brucei* (Fig. 2). Based on colocalization  
107 studies in BSF cells with the basal body marker YL1/2 and the DNA stain DAPI the protein localizes  
108 between the basal body and the kDNA in the KFZ (Fig. 2A). MiRF172 is expressed throughout the cell  
109 cycle in both lifecycle stages (Fig. 2B, C). The protein forms two foci 180° apart on kDNA discs in  
110 1K1N, 2K1N and 2K2N (K = kinetoplast, N = nucleus, 1K1N = cells are in G1 of the cell cycle, 2K1N=  
111 cells are in nuclear S phase, 2K2N = cells just prior to cytokinesis) cells in both life cycle stages (Fig.  
112 2B, C; Fig. 3A upper panel, 93% of the cells showed this MiRF172 localization) reminiscent of the  
113 antipodal sites that have been described for many kDNA associated proteins (Jensen and Englund,  
114 2012). In rare cases, we also observed localization of MiRF172 covering the whole disk (in 1% of  
115 1K1N, 2K1N or 2K2N cells) or forming circles around the whole kDNA disk (in 1% of 1K1N, 2K1N  
116 or 2K2N cells). During replication of the kDNA when the mitochondrial genome adopts a bilobed  
117 structure (Fig. 2B, C; d1K1N) MiRF172 remains as two foci on the opposing sites (in 64% of all  
118 d1K1N, Fig. 3A lower panel) until just prior to the division of the kDNA, when a third spot appears in  
119 the middle between the two segregating discs (in 36% of all d1K1N cells, Fig. 3A lower panel, model  
120 Fig. 3C). After segregation, the second spot is present on each of the kDNA disc (model Fig. 3C). In  
121 3D reconstructions of 1K1N kDNA discs using super resolution STED imagery the protein forms two  
122 curved structures each covering about 25% of the kDNA circumference facing the KFZ (Fig. 3B).

123 We also used biochemical approaches to isolate mitochondria as described previously (Trikin et al.,  
124 2016). Solubilization of the mitochondrial fraction with 1% digitonin leads to an insoluble and soluble  
125 fraction. MiRF172 remained mostly associated with the insoluble fraction even after DNaseI treatment  
126 (Fig. S2B, C). Furthermore, we isolated flagella from the cells as described previously (Ogbadoyi,  
127 2003) and could show that MiRF172 remains associated with flagella (Fig. S2A) similar to what has

128 been described for TAC components (Gheiratmand et al., 2013; Käser et al., 2016; Trikin et al., 2016;  
129 Zhao et al., 2008).

130

### 131 **RNAi of MiRF172 leads to growth retardation and kDNA loss**

132 To study the function of MiRF172 we depleted the mRNA by RNAi in NYsm BSF cells using the  
133 tetracycline inducible RNAi vector pTrypRNAiGate. Northern blot analysis showed a decrease of  
134 MiRF172 mRNA by 68% on day three of induction (Fig. 4A). After RNAi induction cells grow at  
135 normal rates until day four when a growth defect becomes visible that is maintained at least until day  
136 eight. The growth defect was not accompanied by any obvious change in cell morphology or motility.  
137 In order to characterize a potential effect of MiRF172 depletion on mitochondrial genome replication  
138 we sampled the population ( $n \geq 100$  for each condition and replicate) at day zero and three post  
139 induction, stained the cells with the DNA dye DAPI and evaluated the relative occurrence of kDNA  
140 and nucleus in different cell cycle stages: Cells with one kDNA and one nucleus (1K1N; cells are in G1  
141 of the cell cycle), cells with already replicated and segregated kDNAs and one nucleus (2K1N, cells are  
142 in nuclear S phase), as well as cells that had replicated both, the kDNA and the nucleus (2K2N, cells  
143 just prior to cytokinesis). We also screened for any abnormal K-N combinations like 1K2N (likely a  
144 product of kDNA missegregation), 1K0N (zoid cells) as well as 0K1N (indicative of kDNA  
145 replication/segregation defects). The major change in K-N combinations was the accumulation of 0K1N  
146 cells to about 20% at day three post induction, just prior to the appearance of the growth phenotype  
147 (Fig. 4B, C). At the same time point we observed that 30% of 1K1N cells had smaller kDNAs than in  
148 the uninduced cells (Fig. 4B, C).

149

### 150 **RNAi of MiRF172 leads to an accumulation of smaller kDNA networks**

151 To better characterize the kDNA loss phenotype we performed thin section transmission electron  
152 microscopy (TEM) and examined the ultra-structure of the kDNA networks of BSF cells induced for  
153 RNAi and compared them to uninduced cells. We measured the length of the striated structure that  
154 corresponds to a cross section through the kDNA disc in  $\geq 30$  randomly acquired kDNA images in each;  
155 uninduced and induced cells. In uninduced cells, the mean diameter of the kDNA was 544 nm while in  
156 induced cells it was significantly ( $p\text{-value} = 2.71 \times 10^{-8}$ ) reduced to 368 nm (Fig. 4D, S1). Although the  
157 size (diameter) of the network was reduced, the overall appearance of the striated structure and its  
158 relative position to the basal body did not change.

159

### 160 **RNAi of MiRF172 in $\gamma$ L262P BSF cells has no influence on growth**

161 In order to test if MiRF172 has essential functions that are not directly related to kDNA maintenance  
162 and whether the kDNA loss phenotype is a secondary effect, we used the recently established  $\gamma$ L262P  
163 cell line that harbors a single point mutation in the  $F_1F_0$ -ATPase and is able to compensate for the loss

164 of the kinetoplast similar to "petite" mutants in yeast (Dean et al., 2013).  $\gamma$ L262P BSF cells were  
165 transfected with the inducible RNAi vector, which was previously used to generate the MiRF172 RNAi  
166 BSF cell line. We essentially performed the same analysis as described above and observed that, while  
167 the  $\gamma$ L262P MiRF172 RNAi cells lost kDNA at a similar rate ( $n \geq 100$  for each condition) as the NYsm  
168 strain, the cells showed no additional growth phenotype suggesting that the sole function of MiRF172  
169 is in kDNA maintenance and loss of kDNA is a direct effect of the depletion of MiRF172 (Fig. 4E, F).

170

### 171 **RNAi of MiRF172 leads to a loss of mini- and maxicircles**

172 The results described above suggest that MiRF172 is involved in kDNA replication. To study the effect  
173 of kDNA loss in more detail, we performed Southern blot analyses of mini- and maxicircles in MiRF172  
174 RNAi BSF cells. Whole cell DNA was extracted at day 0, day 3, day 5 and day 7 upon RNAi induction.  
175 The DNA samples were digested with HindIII and XbaI, resolved on an agarose gel and blotted on  
176 nylon membranes and probed for maxi- and minicircles. As a loading control, we used a probe targeting  
177 tubulin. We performed three biological replicates. Significance of the results was calculated using the  
178 two-tailed unpaired t-test (mini- and maxicircles d0 vs. d7  $p \leq 0.05 = *$ , covalently closed minicircles  
179 d0 vs. d5  $p \leq 0.01 = **$ , nicked / gapped minicircles  $p \leq 0.05 = *$ ). We detected a steady decrease of  
180 maxi- and minicircle abundance to about 60% of the uninduced levels from day zero to day five post  
181 induction of RNAi after which the amount of maxi- and minicircles increased again slightly (Fig. 5A,  
182 B). To further study the effect of MiRF172 depletion on minicircle replication we performed Southern  
183 blot analysis of minicircles released from the network, prior and post replication, respectively. For this  
184 whole DNA was extracted from uninduced and MiRF172 depleted cells at day 3, 5 and 7 upon RNAi.  
185 Southern blotting was done as described above but without restriction digest of the DNA (Fig. 5C, D).  
186 We detected a steady decrease of the covalently closed minicircles that have been released from the  
187 network but have not yet been replicated. For the nicked / gapped population, that represents the newly  
188 replicated intermediates prior to reattachment, increased significantly ( $p \leq 0.05$ ) until day five post  
189 induction. They then returned to the initial levels (Fig. 5C, D). Based on these results we suggest that  
190 MiRF172 is involved in the replication of the kDNA and more specifically in the reattachment process  
191 of the replicated minicircles to the kDNA network.

192

### 193 **RNAi of MiRF172 has no impact on the TAC**

194 Based on the observation that MiRF172 remains associated with the flagellum after flagellar extraction  
195 from BSF cells (same as TAC102, Fig. S2A) and that MiRF172 localizes in the region of the KFZ (Fig.  
196 1A) we wondered if the protein would colocalize with a TAC marker protein of the ULF such as  
197 TAC102. For this we used immunofluorescence microscopy. The imagery shows that MiRF172 is  
198 located between TAC102 and the kDNA disc with little to no overlap between the two MiRF172 signals  
199 and the TAC102 signal (Figure 6A). As mentioned above biogenesis of the second signal for MiRF172

200 at the kDNA disc occurs during kDNA division and thus prior to the replication of the TAC102 signal  
201 (Hoffmann et al., 2017; Trikin et al., 2016). To test whether depletion of MiRF172 has an impact on  
202 TAC biogenesis, we probed for TAC102 during three days of MiRF172 RNAi. Even though we  
203 observed the typical MiRF172 depletion phenotype including increase in OK1N cells and cells with  
204 smaller kDNAs, however we did not detect a loss in the signal for TAC102 (Fig. 6B).

205

### 206 **TAC is required for proper MiRF172 localization**

207 We then wondered if the TAC structure itself has an impact on the localization of MiRF172. For this  
208 we created a cell line that allows inducible depletion of p197, a TAC component in the EZF which leads  
209 to disruption of the TAC connection between the basal bodies and the kDNA and mislocalization of  
210 TAC102 (Gheiratmand et al., 2013; Hoffmann et al., 2017). After five days of p197 mRNA depletion  
211 >98% of the cells had lost the kDNA as described previously (Hoffmann et al., 2017) and approximately  
212 half of the cells had no signal for MiRF172 as well as TAC102 (Fig. 6C), while the other half of the  
213 cells showed a signal for MiRF172 and TAC102 both in close proximity but not at the proper wild type  
214 position in the mitochondrion (Fig. 6C). Three days after recovery from p197 RNAi the TAC102 protein  
215 was relocalizing properly in vicinity of the basal body as previously described (Hoffmann et al., 2017).  
216 For MiRF172 we found a similar behavior. After the recovery from p197 RNAi MiRF172 relocalized  
217 in the proximity of TAC102 however it mostly remained as a single spot, rather than two spots as  
218 observed in the wild type situation (Fig. 6C).



## 219 **Discussion**

220

221 MiRF172 has no similarities to any other proteins except for the low complexity regions of the C-  
222 terminus (Fig. 1). Here, some weak similarities to trfA, a general transcription corepressor and a  
223 putative kinase both from Dictyostelium can be found (Aslett et al., 2009). Consistent with its essential  
224 function in kDNA replication, MiRF172 is conserved in the currently sequenced Kinetoplastea (Fig.  
225 1A). Of the two recognizable domains (Fig. 1B) the C-terminal alanine/lysine rich region is present in  
226 all currently sequenced Kinetoplastea, while the poly-Q stretch is only found in the genus of  
227 trypanosomes. We speculate that this variation in the MiRF172 sequence is related to the two kDNA  
228 replication models that essentially differ in the reattachment process, which have been proposed for  
229 Crithidia and *T. brucei* (Jensen and Englund, 2012). MiRF172 localizes to two regions around the  
230 mitochondrial genome that have been described as the antipodal sites in numerous publications (Jensen  
231 and Englund, 2012; Povelones, 2014), however the actual composition and dynamics during the kDNA  
232 replication cycle as well as the relative position of the individual components in this large structure  
233 remain mostly unknown. MiRF172 is present throughout the entire mitochondrial replication and  
234 segregation phase in *T. brucei* similar to the primases PRI1 and PRI2, the helicases Pif1 and Pif5, the  
235 endonuclease SSE1 and the mitochondrial type II topoisomerase (Engel and Ray, 1999; Hines and Ray,  
236 2010; Hines and Ray, 2011; Li et al., 2007; Liu et al., 2006; Liu et al., 2010). This is different from the  
237 polymerase Pol  $\beta$ , for example that is only at the antipodal sites during replication (Bruhn et al., 2010;  
238 Saxowsky et al., 2003). We describe MiRF172 as a novel mitochondrial genome replication factor in  
239 *T. brucei*. The current model predicts that replication of the minicircles is initiated after the release into  
240 the KFZ by a topoisomerase activity, through binding of the UMSBP and several replication factors,  
241 including the two polymerases PolIB and PolIC (Bruhn et al., 2010; Bruhn et al., 2011; Milman et al.,  
242 2007). The minicircles are then moved to the antipodal sites by an unknown mechanism. At the  
243 antipodal sites primer removal by a single strand endonuclease SSE-1 and the helicase Pif5 are initiated  
244 after which gap filling by polymerase Pol  $\beta$  and finally sealing of most of the gaps through ligase LIG  
245 k $\beta$  occur (Downey et al., 2005; Engel and Ray, 1999; Klingbeil et al., 2002; Saxowsky et al., 2003).  
246 Afterwards the minicircles are reattached to the growing network, likely by topoisomerase activity  
247 (Wang and Englund, 2001). In the kDNA disc the last minicircle gaps are repaired through a  
248 combination of Pol $\beta$ -Pak and the DNA ligase LIG k $\alpha$  and likely other proteins (Downey et al., 2005;  
249 Klingbeil and Englund, 2004; Klingbeil et al., 2002). Based on the current model, an accumulation of  
250 gapped free minicircles as detected in the MiRF172 RNAi analysis, points towards a function of  
251 MiRF172 in the reattachment process. The only other currently known protein to be involved in  
252 reattachment is the mitochondrial topoisomerase TOPOII, which is also localized at the antipodal sites.  
253 Thus, we predict MiRF172 and TOPOII to interact with each other in the process of minicircle  
254 reattachment in *T. brucei*. One could imagine that MiRF172 might aid the topoisomerase in the

255 discrimination between replicated and non-replicated minicircles. In the future, biochemical co-  
256 immunoprecipitation studies should allow us to test this model.

257 The proximity of the kDNA replication and segregation machinery in *T. brucei* could suggest a physical  
258 interaction between the two processes in the KFZ. This is supported by the biochemical fractionations  
259 indicating that MiRF172 remains associated with the isolated flagellum and is present in the pellet  
260 fraction of the digitonin extraction even after DNaseI treatment (Fig. S2).

261 Interestingly MiRF172 has no impact on proper TAC biogenesis, however TAC biogenesis is required  
262 for proper MiRF172 localization since loss of the TAC structure also leads to loss of proper MiRF172  
263 localization. Even in the absence of kDNA in the "petite" trypanosomes, MiRF172 localizes close to  
264 TAC102 although in a different conformation. This suggests that the TAC does provide important  
265 localization information for replication proteins such as MiRF172. It will be interesting to test if this is  
266 also true for the topoisomerase and other antipodal site proteins.

## 267 **Material and Methods**

268

### 269 ***T. brucei* cell culture conditions**

270 Monomorphic *T. brucei* BSF NYsm (Wirtz et al., 1999) and NYsm-derived  $\gamma$ L262P (Dean et al., 2013)  
271 cells were cultured in Hirumi-modified Iscove's medium 9 (HMI-9) supplemented with 10% fetal calf  
272 serum (FCS) and incubated at 37°C and 5% CO<sub>2</sub>. Procyclic form (PCF) 427 *T. brucei* cells were cultured  
273 in semi-defined medium-79 (SDM-79) supplemented with 10% FCS at 27°C. Depending on the cell  
274 line 5  $\mu$ g/ml blasticidin, 2.5  $\mu$ g/ml geneticin, 2.5  $\mu$ g/ml hygromycin, 2.5  $\mu$ g/ml phleomycin or 0.5  $\mu$ g/ml  
275 puromycin were added to the medium. Expression of the RNAi construct was induced through the  
276 addition of 1  $\mu$ g/ml tetracycline. NYsm BSF, 427 PCF trypanosomes were obtained from the  
277 established collection of the Institute of Cell Biology, University of Bern, Bern, Switzerland. The  
278  $\gamma$ L262P strain of BSF cells is a kind gift of A. Schnauffer.

279

### 280 **Transfections of *T. brucei* cells**

281 For transfections, 10  $\mu$ g of linearized plasmid or PCR product were dissolved in 100  $\mu$ l BSF transfection  
282 buffer (90 mM Na- phosphate pH 7.3, 5 mM KCl, 0.15 mM CaCl<sub>2</sub>, 50 mM HEPES pH 7.3) (Burkard  
283 et al., 2007).  $4 \times 10^7$  mid-log phase BSF cells were pelletized and resuspended in 100  $\mu$ l BSF transfection  
284 buffer containing the DNA. The cells were transferred into Amaxa Nucleofector cuvettes and  
285 transfections were conducted in the Amaxa Nucleofector II using program Z-001 (panel V 1.2 kV, panel  
286 T 2.5 kV, panel R 186 Ohm, panel C 25  $\mu$ F). For transfections of PCF cells, 10  $\mu$ g of PCR product were  
287 dissolved in 400  $\mu$ l Zimmerman postfusion media (ZPFM, 132 mM NaCl, 8 mM KCl, 8mM Na<sub>2</sub>HPO<sub>4</sub>,  
288 1.5 mM KH<sub>2</sub>PO<sub>4</sub>, 0.5 mM MgAc<sub>2</sub>, 0.09 mM CaAc<sub>2</sub>).  $10^8$  mid-log phase PCF cells were pelletized and  
289 resuspended in the ZPFM containing the DNA and transferred into Amaxa Nucleofector cuvettes.  
290 Transfections were conducted with 1500V, 180 ohms, 25 $\mu$ F (BTX). The transfected cells were left to  
291 recover for 20 h. Cells were then selected with appropriate antibiotics for correct integration of the  
292 construct.

293

### 294 **DNA constructs**

295 The MiRF172 RNAi constructs were targeted against the 4409 to 4719 bp and of the ORF and 1 to 10  
296 bp of the 3' UTR of the gene Tb927.3.2050. Briefly, a PCR fragment with adaptor sequences was  
297 amplified from genomic DNA of NYsm BSF cells, and cloned in two steps into the pTrypRNAiGate  
298 vector by Gateway cloning (Kalidas et al., 2011). The final plasmids linearized with NotI HF (NEB)  
299 were used for transfection as described above. Expression was induced by addition of 1  $\mu$ g/ml  
300 tetracycline. For C-terminal PTP-tagging of MiRF172, the ORF positions 4404 to 4895 were amplified  
301 from genomic DNA of NYsm BSF cells and cloned between ApaI / NotI sites of the pLEW100 based  
302 PTP tagging vector (Schimanski et al., 2005). The resulting plasmid was linearized with BsmI prior to

303 transfection. For the C-terminal triple HA-tagging, a PCR with primers containing overhangs  
304 complementary to the ORF from 4617 to 4716 and the 3' UTR from 1 to 99 was performed. The  
305 pMOTagging plasmid served as a template (Oberholzer et al., 2006). Both tagging constructs were  
306 recombined into the endogenous locus to substitute for one of the Tb927.3.2050 alleles and thus was  
307 constantly expressed.

308

### 309 **Immunofluorescence analysis**

310 Approximately  $10^6$  cells were spread onto a slide and fixed for 4 min with 4% PFA in PBS (137 mM  
311 NaCl, 2.7 mM KCl, 10 mM  $\text{Na}_2\text{HPO}_4$ , 2 mM  $\text{KH}_2\text{PO}_4$ , pH 7.4). After fixation and washing with PBS  
312 cells were permeabilized with 0.2% Triton-X 100 in PBS for 5 min. Then cells were blocked with 4%  
313 BSA in PBS for 30 min. After blocking, slides were incubated for 45 or 60 min with the primary  
314 antibody followed by washing with PBS + 0.1% Tween-20 (PBST) and incubation with the secondary  
315 antibody for 45 or 60 min followed by washing with PBST and PBS. All incubations were performed  
316 at room temperature. Primary and secondary antibodies were diluted in PBS + 4% BSA as follows: rat-  
317  $\alpha$ -HA (Sigma) 1:1000, polyclonal rabbit- $\alpha$ -Protein-A (Sigma) detecting the PTP epitope 1:2000, mouse  
318 BBA4 antibody (Woods et al., 1989) 1:100, rat YL1/2 antibody detecting tyrosinated tubulin as present  
319 in the basal body (Kilmartin et al., 1982) 1:100000, Alexa Fluor® 594 Goat- $\alpha$ -Rabbit IgG (H+L) (Life  
320 technologies), Alexa Fluor® 488 Goat- $\alpha$ -Rabbit IgG (H+L) (Invitrogen), Alexa Fluor® 488 Goat- $\alpha$ -  
321 Rat IgG (H+L) (Life technologies), Alexa Fluor® 488 Goat- $\alpha$ -Mouse IgG (H+L) (Invitrogen), Alexa  
322 Fluor® 594 Goat- $\alpha$ -Mouse IgG (H+L) (Molecular probes), Alexa Fluor® 647 Goat-  $\alpha$ -Rat IgG (H+L)  
323 (Life technologies) all 1:1000. Cells were mounted with ProLong® Gold Antifade Mounting Medium  
324 with DAPI (Molecular Probes) and cover slips were added. Images were acquired with the Leica  
325 DM5500 B microscope (Leica Microsystems) with a 100 $\times$  oil immersion phase contrast objective.  
326 Images were analyzed using LAS X software (Leica Microsystems) and ImageJ. Significance of the  
327 quantification of relative occurrence of kDNA and nucleus in different cell cycle stages was calculated  
328 using the two-tailed unpaired t-test.

329

### 330 **Super resolution 3D STED (Stimulated Emission Depletion) microscopy**

331 MiRF172-PTP BSF cells were spread and fixation, permeabilization and blocking were performed as  
332 described above. Polyclonal rabbit- $\alpha$ -Protein-A antibody (Sigma) and the Alexa Fluor® 594 goat- $\alpha$ -  
333 Rabbit IgG (H+L) antibody were used as described above. Cover glasses (Nr. 1.5) suitable for 3D STED  
334 microscopy (Marienfeld) were used. Cells were mounted in ProLong with DAPI as described above.  
335 Images were acquired using the SP8 STED microscope (Leica, with a 100 $\times$  oil immersion objective  
336 and the LAS X Leica software) as z-stacks with a z-step size of 120 nm. For the MiRF172-PTP signal  
337 the 594 nm excitation laser, the 770 nm depletion laser were used. The DAPI signal was acquired with  
338 confocal settings. Images were deconvoluted with the Huygens professional software.

339

### 340 **Transmission electron microscopy (TEM)**

341 Embedding of the cells and thin sectioning for TEM was performed as described previously (Trikin et  
342 al., 2016). Images of the thin sections were obtained by the FEI Morgani electron microscope (Tungsten  
343 cathode). The microscope was equipped with a digital camera (Morada, 12 megapixel, Soft Imaging  
344 System) and the AnalySIS iTEM image analysis software. The kDNA structure of uninduced cells (-  
345 tet) and induced cells at day three upon induction (+tet d3) was measured using ImageJ. All images are  
346 taken at a magnification of 28000×. Significance of the results was calculated using the two-tailed  
347 unpaired t-test.

348

### 349 **SDS-PAGE and western blotting**

350 Whole cell lysates were used for western blot analysis. Cells were washed in PBS and resuspended in  
351 1× Laemmli buffer (12 mM Tris-Cl pH 6.8, 0.4% SDS, 2% glycerol, 1% β-mercaptoethanol, 0.002%  
352 bromophenol blue) in PBS and heated for 5 min at 95 °C. Approximately 5×10<sup>6</sup> cells were loaded onto  
353 a 4% or 6% gel, resolved and then blotted (BioRAD blotting system) onto PVDF Immobilon®- FL  
354 transfer membranes (0.45 μm, MILLIPORE) for 1 h at 100 V. Membranes were blocked in PBST + 5%  
355 skim milk powder. The rabbit peroxidase anti-peroxidase soluble complex (PAP) was diluted 1:2000  
356 in PBST + 5% skim milk and incubated for 30 min at RT. The mouse-anti-EF1alpha (Santa Cruz), rat-  
357 anti-HA and the rabbit-anti-HA antibodies (Sigma) were used 1:1000 in PBST + 5% skim milk.  
358 Secondary antibodies were: swine anti-rabbit HRP-conjugate (1:10000, Dako) and rabbit anti-rat HRP-  
359 conjugate (1:10000, Dako), all in PBST + 5% skim milk. After each incubation with the antibodies, the  
360 membranes were washed 3× for 5 min in PBST and 1× for 5 min in PBS. SuperSignal West Femto  
361 Maximum Sensitivity Substrate (Thermo Scientific) and Amersham™ Imager 600 (GE Healthcare Life  
362 Sciences) were used to visualize the protein bands on the blots.

363

### 364 **Northern blotting**

365 Total RNA was extracted from mid-log phase MiRF172 RNAi BSF cells with 1 ml of RiboZol™  
366 (Amresco) per 5×10<sup>7</sup> cells. For northern blot analysis, 10 μg of total RNA was separated for two hours  
367 at 100 V in a 1% agarose gel containing 6% formaldehyde. RNA was blotted onto Hybond nylon  
368 membranes with 20× SSC (3 M NaCl, 0.3 M Na-citrate pH 7) by capillary transfer. The RNA on the  
369 nylon membrane was cross-linked with Stratagene UV-Stratalinker. Membranes were pre-hybridized  
370 at 65°C for one hour in hybridization solution (5× SSC, 1:12.5 100× Denhardt's (2% BSA, 2%  
371 polyvinylpyrrolidone, 2% Ficoll), 50 mM NaHPO<sub>4</sub> pH 6.8, 1% SDS, 100 μg/ml salmon sperm DNA).  
372 The sequence specific probe for MiRF172 mRNA was generated by PCR (Primers used: 5'-  
373 ggggacaagtttgtaaaaaagcaggctCCCTGAGAAGGAACTTGAGC-3' and 5'-  
374 ggggaccactttgtacaagaaagctgggtGGCTGCTCATCTACCGCTT-3'). The probes were denatured in

375 ddH<sub>2</sub>O for 5 min at 95°C. Random primed DNA labeling kit (Roche) was used according to the  
376 manufacturer's manual to label the probes. For normalization, 1.8 µl 18S rRNA probes (10 µM, (Trikin  
377 et al., 2016)) was mixed with 12.5 µl H<sub>2</sub>O, 2.7 µl gamma-<sup>32</sup>P-ATP (1 MBq), 2 µl PNK buffer (10×) and  
378 1 µl T4 PNK and incubated for 30 min at 37°C. Reactions were stopped with 5 µl EDTA (0.2 M) and  
379 75 µl TE buffer (1×) and incubated 5 min at 95° C. Probes were quenched for 2 min on ice and 50 µl  
380 of probe mixture was added to the membrane. Probes and pre-hybridized membranes were incubated  
381 over night at 65°C and washed in 2× SSC, 0.1% SDS and/or 0.2× SSC, 0.1% SDS at 60°C. Blots probed  
382 for MiRF172 RNA were exposed for 24 hours, when probed for 18S rRNA - for approximately 15 min,  
383 to storage phosphor screens in metal cassettes (Amersham Bioscience) and scanned by a Storm  
384 PhosphoImager (Amersham Bioscience). ImageJ was used for image analysis and quantification.

385

### 386 **Southern blotting**

387 Total DNA was isolated from mid-log phase MiRF172 RNAi BSF cells. For this, cells were washed in  
388 PBS and resuspended in 1ml of phenol per 5×10<sup>7</sup> cells. Experimental procedure and analysis was  
389 performed as described previously (Trikin et al., 2016). 5 µg of total DNA either undigested (for  
390 detection of free minicircles) or digested with HindIII and XbaI (for detection of total mini- and  
391 maxicircles) was resolved in 1% agarose gel within 35 min for total minicircles or 2 h for free  
392 minicircles at 135 V in 0.5× TAE buffer. Sequence specific probes for minicircles were generated from  
393 a PCR fragment (approx. 100 bp of the conserved minicircle sequence (Trikin et al., 2016)) amplified  
394 from total DNA of NYsm BSF *T. brucei*. The maxicircle probe (Trikin et al., 2016) was amplified from  
395 total DNA of NYsm BSF *T. brucei* too using the following primers: 5' -  
396 CTAACATACCCACATAAGACAG-3' and 5' -ACACGACTCAATCAAAGCC-3' (Liu et al., 2006).  
397 For the normalization, a tubulin probe (binding to the intergenic region between α- and β-tubulin,  
398 fragment size 3.6 kb, (Trikin et al., 2016)) was used and it was generated and labelled in the same way  
399 as the minicircle and maxicircle probes. Blots were exposed for 24, 48 or 72 hours to storage phosphor  
400 screens in metal cassettes (Amersham Bioscience) and scanned by Storm PhosphoImager (Amersham  
401 Bioscience). ImageJ was used for image analysis and quantification. Significance of the results was  
402 calculated using the two-tailed unpaired t-test.

403

### 404 **Flagellar extraction**

405 For flagellar extraction, EDTA was added to BSF cells in medium with an end concentration of 5 mM.  
406 Cells were washed with PBS and then resuspended in extraction buffer (10 mM NaH<sub>2</sub>PO<sub>4</sub>, 150 mM  
407 NaCl, 1 mM MgCl<sub>2</sub>) containing 0.5% TritonX-100, on ice. After one washing step with extraction  
408 buffer, cells were incubated on ice for 45 min in extraction buffer containing 1 mM CaCl<sub>2</sub> and then  
409 subjected to immunofluorescence analysis as described above.

410

411 **Digitonin fractionations**

412 For digitonin fractionation  $10^7$  cells were collected and washed with PBS. Then they were resuspended  
413 in SoTE buffer (0.6 M sorbitol, 2 mM EDTA, 20 mM Tris-HCl, pH 7.5). Digitonin was added to a final  
414 concentration of 0.025% or 1% and the mixture was incubated on ice for 5min. To separate the fractions,  
415 cells were centrifuged at 8000 rcf for 5 min at 4°C. Both fractions (supernatant and pellet) were mixed  
416 with Laemmli buffer for western blot analysis.

417 **Acknowledgement**

418

419 For the BBA4 and YL1/2 antibodies we would like to thank Keith Gull. We acknowledge Bernd  
420 Schimanski and Beat Haenni for technical assistance, Anneliese Hoffmann for critical reading of the  
421 manuscript, Borka Jojic and Roman Trikin for critical discussion. Electron microscopy sample  
422 preparation and imaging was performed with devices supported by the Microscopy Imaging Center  
423 (MIC) of the University of Bern, Switzerland. For financial support, we thank the Berne University  
424 Research Foundation and the Novartis Foundation.

425

426

427

428 **Competing Interest**

429

430 The authors declare no competing financial, personal or professional competing interests.

431

432

433

434 **Author Contribution**

435

436 Torsten Ochsenreiter (TO) and Simona Amodeo (SA) designed the experiments. SA performed the  
437 experiments and analyses. Martin Jakob (MJ) and SA designed the model of MiRF172 localization. TO  
438 and SA wrote the manuscript. MJ read and participated in the corrections of the initial draft.



439 **References**

- 440
- 441 **Aphasizheva, I. and Aphasizhev, R.** (2016). U-Insertion/Deletion mRNA-Editing Holoenzyme:  
442 Definition in Sight. *Trends Parasitol.* **32**, 144–156.
- 443 **Aslett, M., Aurrecochea, C., Berriman, M., Brestelli, J., Brunk, B. P., Carrington, M.,  
444 Depledge, D. P., Fischer, S., Gajria, B., Gao, X., et al.** (2009). TriTrypDB: A functional  
445 genomic resource for the Trypanosomatidae. *Nucleic Acids Res.* **38**, 457–462.
- 446 **Bruhn, D. F., Mozeleski, B., Falkin, L. and Klingbeil, M. M.** (2010). Mitochondrial DNA  
447 polymerase POLIB is essential for minicircle DNA replication in African trypanosomes. *Mol.*  
448 *Microbiol.* **75**, 1414–1425.
- 449 **Bruhn, D. F., Sammartino, M. P. and Klingbeil, M. M.** (2011). Three mitochondrial DNA  
450 polymerases are essential for kinetoplast DNA replication and survival of bloodstream form  
451 *Trypanosoma brucei*. *Eukaryot. Cell* **10**, 734–743.
- 452 **Burkard, G., Fragoso, C. M. and Roditi, I.** (2007). Highly efficient stable transformation of  
453 bloodstream forms of *Trypanosoma brucei*. *Mol. Biochem. Parasitol.* **153**, 220–223.
- 454 **Chen, J., Rauch, C. A., White, J. H., Englund, P. T. and Cozzarelli, N. R.** (1995). The topology of  
455 the kinetoplast DNA network. *Cell* **80**, 61–69.
- 456 **Dean, S., Gould, M. K., Dewar, C. E. and Schnauffer, A. C.** (2013). Single point mutations in ATP  
457 synthase compensate for mitochondrial genome loss in trypanosomes. *Proc. Natl. Acad. Sci.*  
458 **110**, 14741–14746.
- 459 **Downey, N., Hines, J. C., Sinha, K. M. and Ray, D. S.** (2005). Mitochondrial DNA Ligases of  
460 *Trypanosoma brucei*. *Eukaryot. Cell* **4**, 765–774.
- 461 **Drewa, M. E. and Englund, P. T.** (2001). Intramitochondrial location and dynamics of *Crithidia*  
462 *fasciculata* kinetoplast minicircle replication intermediates. *J. Cell Biol.* **153**, 735–743.
- 463 **Engel, M. L. and Ray, D. S.** (1999). The kinetoplast structure-specific endonuclease I is related to  
464 the 5' exo/endonuclease domain of bacterial DNA polymerase I and colocalizes with the  
465 kinetoplast topoisomerase II and DNA polymerase beta during replication. *Proc. Natl. Acad. Sci.*  
466 *U. S. A.* **96**, 8455–60.
- 467 **Gheiratmand, L., Brasseur, A., Zhou, Q. and He, C. Y.** (2013). Biochemical characterization of the  
468 bi-lobe reveals a continuous structural network linking the bi-lobe to other single-copied  
469 organelles in *Trypanosoma brucei*. *J. Biol. Chem.* **288**, 3489–3499.

- 470 **Göringer, H. U.** (2012). “Gestalt,” composition and function of the *Trypanosoma brucei* editosome.  
471 *Annu. Rev. Microbiol.* **66**, 65–82.
- 472 **Gunasekera, K., Wüthrich, D., Braga-Lagache, S., Heller, M. and Ochsenreiter, T.** (2012).  
473 Proteome remodelling during development from blood to insect-form *Trypanosoma brucei*  
474 quantified by SILAC and mass spectrometry. *BMC Genomics* **13**, 556.
- 475 **Hajduk, S. and Ochsenreiter, T.** (2010). RNA editing in kinetoplastids. *RNA Biol.* **7**, 229–236.
- 476 **Hines, J. C. and Ray, D. S.** (2010). A mitochondrial DNA primase is essential for cell growth and  
477 kinetoplast DNA replication in *Trypanosoma brucei*. *Mol. Cell. Biol.* **30**, 1319–28.
- 478 **Hines, J. C. and Ray, D. S.** (2011). A second mitochondrial DNA primase is essential for cell growth  
479 and kinetoplast minicircle DNA replication in *Trypanosoma brucei*. *Eukaryot. Cell* **10**, 445–454.
- 480 **Hoffmann, A., Käser, S., Jakob, M., Amodeo, S., Peitsch, C., Vaughan, S., Zuber, B., Schneider,**  
481 **A. and Ochsenreiter, T.** (2017). A molecular model of the mitochondrial genome segregation  
482 machinery in *Trypanosoma brucei* Keywords. 1–26. BioRxiv doi: 10.1101/188987
- 483 **Hong, M. and Simpson, L.** (2003). Genomic organization of *Trypanosoma brucei* kinetoplast DNA  
484 minicircles. *Protist* **154**, 265–79.
- 485 **Jakob, M., Hoffmann, A., Amodeo, S., Peitsch, C., Zuber, B. and Ochsenreiter, T.** (2016).  
486 Mitochondrial growth during the cell cycle of *Trypanosoma brucei* bloodstream forms. *Sci. Rep.*  
487 **6**, 36565.
- 488 **Jensen, R. E. and Englund, P. T.** (2012). Network News: The Replication of Kinetoplast DNA.  
489 *Annu. Rev. Microbiol.* **66**, 473–491.
- 490 **Kalidas, S., Li, Q. and Phillips, M. A.** (2011). A Gateway® compatible vector for gene silencing in  
491 bloodstream form *Trypanosoma brucei*. *Mol. Biochem. Parasitol.* **178**, 51–55.
- 492 **Käser, S., Oeljeklaus, S., Týč, J., Vaughan, S., Warscheid, B. and Schneider, A.** (2016). Outer  
493 membrane protein functions as integrator of protein import and DNA inheritance in  
494 mitochondria. *Proc. Natl. Acad. Sci.* **113**, E4467–E4475.
- 495 **Käser, S., Willemin, M., Schnarwiler, F., Schimanski, B., Poveda-Huertes, D., Oeljeklaus, S.,**  
496 **Warscheid, B., Meisinger, C. and Schneider, A.** (2017). Biogenesis of a mitochondrial DNA  
497 inheritance machinery in the mitochondrial outer membrane. BioRxiv doi: 10.1101/190751
- 498 **Kilmartin, J. V., Wright, B. and Milstein, C.** (1982). Rat monoclonal antitubulin antibodies derived

- 499 by using a new nonsecreting rat cell line. *J. Cell Biol.* **93**, 576–582.
- 500 **Klingbeil, M. M. and Englund, P. T.** (2004). Closing the gaps in kinetoplast DNA network  
501 replication. *Proc Natl Acad Sci U S A* **101**, 4333–4334.
- 502 **Klingbeil, M. M., Motyka, S. A. and Englund, P. T.** (2002). Multiple mitochondrial DNA  
503 polymerases in *Trypanosoma brucei*. *Mol. Cell* **10**, 175–186.
- 504 **Li, Y., Sun, Y., Hines, J. C. and Ray, D. S.** (2007). Identification of new kinetoplast DNA  
505 replication proteins in trypanosomatids based on predicted S-phase expression and  
506 mitochondrial targeting. *Eukaryot. Cell* **6**, 2303–2310.
- 507 **Liu, B., Molina, H., Kalume, D., Pandey, A., Griffith, J. D. and Englund, P. T.** (2006). Role of  
508 p38 in replication of *Trypanosoma brucei* kinetoplast DNA. *Mol. Cell. Biol.* **26**, 5382–5393.
- 509 **Liu, B., Yildirim, G., Wang, J., Tolun, G., Griffith, J. D. and Englund, P. T.** (2010). TbPIF1, a  
510 *Trypanosoma brucei* mitochondrial DNA helicase, is essential for kinetoplast minicircle  
511 replication. *J. Biol. Chem.* **285**, 7056–7066.
- 512 **Lukeš, J., Hines, J. C., Evans, C. J., Avliyakov, N. K., Prabhu, V. P., Chen, J. and Ray, D. S.**  
513 (2001). Disruption of the *Crithidia fasciculata* KAP1 gene results in structural rearrangement of  
514 the kinetoplast disc. *Mol. Biochem. Parasitol.* **117**, 179–186.
- 515 **McDermott, S. M., Luo, J., Carnes, J., Ranish, J. A. and Stuart, K.** (2016). The Architecture of  
516 *Trypanosoma brucei* editosomes. *Proc. Natl. Acad. Sci. U. S. A.* **113**, E6476–E6485.
- 517 **Milman, N., Motyka, S. A., Englund, P. T., Robinson, D. and Shlomai, J.** (2007). Mitochondrial  
518 origin-binding protein UMSBP mediates DNA replication and segregation in trypanosomes.  
519 *Proc. Natl. Acad. Sci. U. S. A.* **104**, 19250–19255.
- 520 **Oberholzer, M., Morand, S., Kunz, S. and Seebeck, T.** (2006). A vector series for rapid PCR-  
521 mediated C-terminal in situ tagging of *Trypanosoma brucei* genes. *Mol. Biochem. Parasitol.*  
522 **145**, 117–120.
- 523 **Ochsenreiter, T., Cipriano, M. and Hajduk, S. L.** (2007). KISS: the kinetoplastid RNA editing  
524 sequence search tool. *RNA* **13**, 1–4.
- 525 **Ogbadoyi, E. O.** (2003). A High-Order Trans-Membrane Structural Linkage Is Responsible for  
526 Mitochondrial Genome Positioning and Segregation by Flagellar Basal Bodies in  
527 *Trypanosomes*. *Mol. Biol. Cell* **14**, 1769–1779.

- 528 **Peikert, C. D., Mani, J., Morgenstern, M., Käser, S., Knapp, B., Wenger, C., Harsman, A.,**  
529 **Oeljeklaus, S., Schneider, A. and Warscheid, B.** (2017). Charting organellar importomes by  
530 quantitative mass spectrometry. *Nat. Commun.* **8**, 15272.
- 531 **Povelones, M. L.** (2014). Beyond replication: division and segregation of mitochondrial DNA in  
532 kinetoplastids. *Mol. Biochem. Parasitol.* **196**, 53–60.
- 533 **Saxowsky, T. T., Choudhary, G., Klingbeil, M. M. and Englund, P. T.** (2003). Trypanosoma  
534 brucei has two distinct mitochondrial DNA polymerase beta enzymes. *J. Biol. Chem.* **278**,  
535 49095–49101.
- 536 **Schimanski, B., Nguyen, T. N., Günzl, A. and Gu, A.** (2005). Highly Efficient Tandem Affinity  
537 Purification of Trypanosome Protein Complexes Based on a Novel Epitope Combination Highly  
538 Efficient Tandem Affinity Purification of Trypanosome Protein Complexes Based on a Novel  
539 Epitope Combination. *Eukaryot. Cell* **4**, 1942–1950.
- 540 **Schnarwiler, F., Niemann, M., Doiron, N., Harsman, A., Kaser, S., Mani, J., Chanfon, A.,**  
541 **Dewar, C. E., Oeljeklaus, S., Jackson, C. B., et al.** (2014). Trypanosomal TAC40 constitutes a  
542 novel subclass of mitochondrial  $\alpha$ -barrel proteins specialized in mitochondrial genome  
543 inheritance. *Proc. Natl. Acad. Sci.* **111**, 7624–7629.
- 544 **Trikin, R., Doiron, N., Hoffmann, A., Haenni, B., Jakob, M., Schnauffer, A., Schimanski, B.,**  
545 **Zuber, B. and Ochsenreiter, T.** (2016). TAC102 Is a Novel Component of the Mitochondrial  
546 Genome Segregation Machinery in Trypanosomes. *PLoS Pathog.* **12**,.
- 547 **Urbaniak, M. D., Martin, D. M. A. and Ferguson, M. A. J.** (2013). Global quantitative SILAC  
548 phosphoproteomics reveals differential phosphorylation is widespread between the procyclic and  
549 bloodstream form lifecycle stages of Trypanosoma brucei. *J. Proteome Res.* **12**, 2233–2244.
- 550 **Wang, Z. and Englund, P. T.** (2001). RNA interference of a trypanosome topoisomerase II causes  
551 progressive loss of mitochondrial DNA. *EMBO J.* **20**, 4674–4683.
- 552 **Wang, Z., Morris, J. C., Drew, M. E. and Englund, P. T.** (2000). Inhibition of Trypanosoma brucei  
553 gene expression by RNA interference using an integratable vector with opposing T7 promoters.  
554 *J. Biol. Chem.* **275**, 40174–40179.
- 555 **Wirtz, E., Leal, S., Ochatt, C. and Cross, G. A. M.** (1999). A tightly regulated inducible expression  
556 system for dominant negative approaches in Trypanosoma brucei. *Mol. Biochem. Parasitol.* **99**,  
557 89–101.

558 **Woods, A., Sherwin, T., Sasse, R., MacRae, T. H., Baines, A. J. and Gull, K.** (1989). Definition of  
559 individual components within the cytoskeleton of *Trypanosoma brucei* by a library of  
560 monoclonal antibodies. *J. Cell Sci.* **93**, 491–500.

561 **Xu, C. W., Hines, J. C., Engel, M. L., Russell, D. G. and Ray, D. S.** (1996). Nucleus-encoded  
562 histone H1-like proteins are associated with kinetoplast DNA in the trypanosomatid *Crithidia*  
563 *fasciculata*. *Mol. Cell. Biol.* **16**, 564–576.

564 **Zhang, X., Cui, J., Nilsson, D., Gunasekera, K., Chanfon, A., Song, X., Wang, H., Xu, Y. and**  
565 **Ochsenreiter, T.** (2010). The *Trypanosoma brucei* MitoCarta and its regulation and splicing  
566 pattern during development. *Nucleic Acids Res.* **38**, 7378–7387.

567 **Zhao, Z., Lindsay, M. E., Roy Chowdhury, A., Robinson, D. R. and Englund, P. T.** (2008). p166,  
568 a link between the trypanosome mitochondrial DNA and flagellum, mediates genome  
569 segregation. *EMBO J.* **27**, 143–154.

570

571

572 **Figures and Figure Legends**

573

574

575

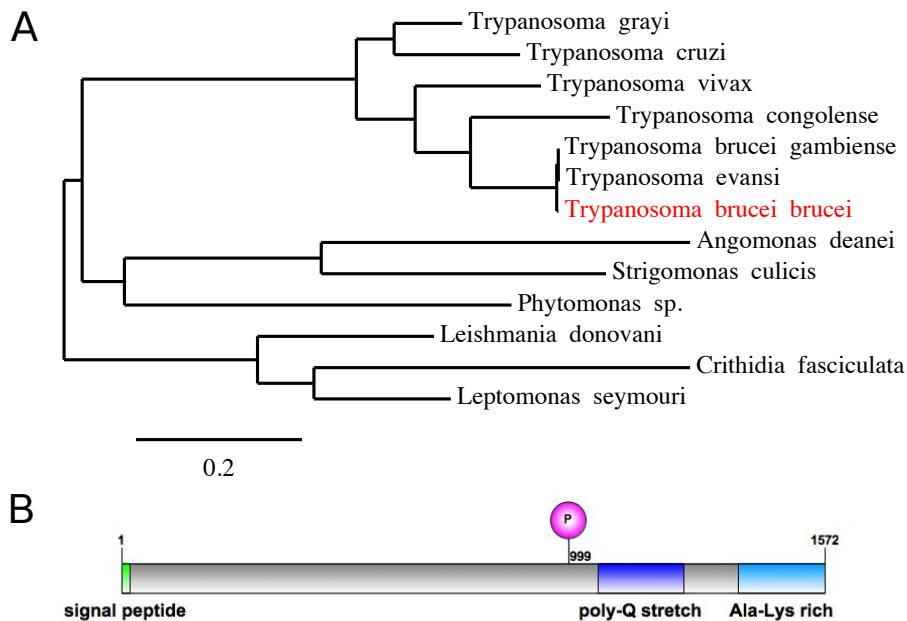

576

577

578 **Fig. 1 | Protein properties of MiRF172 in *T. brucei* cells.** **A)** A phylogenetic tree showing the  
579 conservation of MiRF172 among Kinetoplastids. MiRF172 is highlighted in red. **B)** Illustration of  
580 MiRF172 ORF. Depicted are in green the signal peptide for mitochondrial import, in magenta the  
581 phosphorylation site at position 999, in dark blue the poly-Q stretch enriched domain and in light blue  
582 the alanine and lysine enriched C-terminal domain.

583

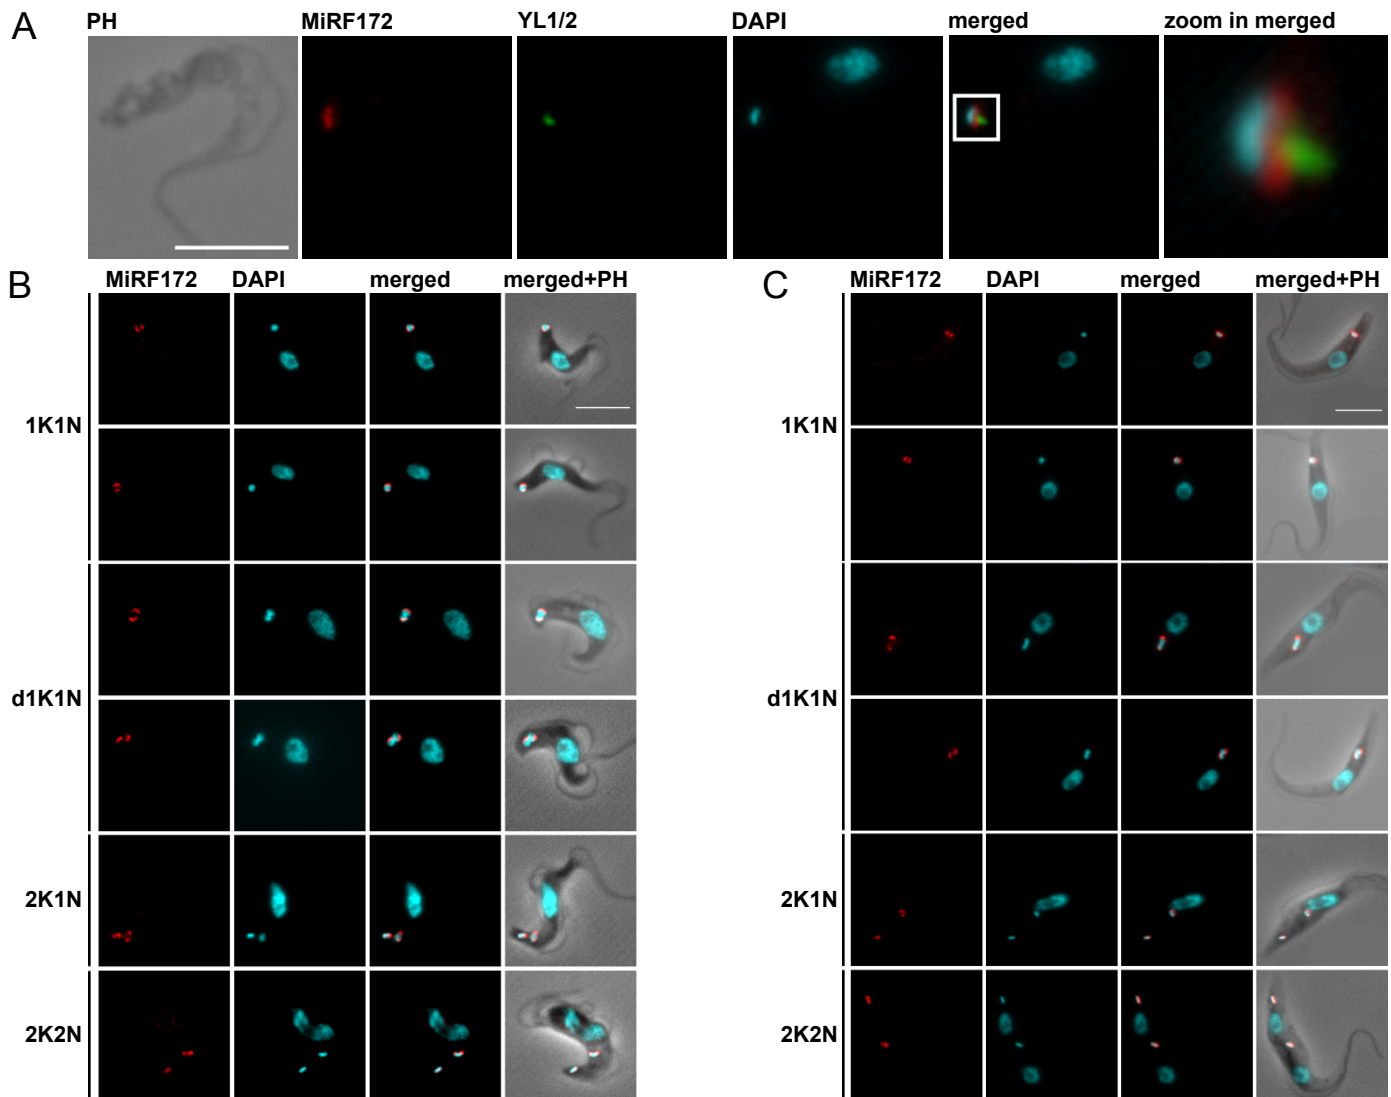

584

585 **Fig. 2 | Localization of MiRF172 in BSF and PCF *T. brucei* cells.** A) Immunofluorescence  
586 microscopy of MiRF172-PTP tagged BSF cells. Localization of MiRF172-PTP (red) is represented by  
587 maximum intensity projections from immunofluorescence microscopy image stacks of *T. brucei* BSF  
588 cells. MiRF172-PTP was detected by the  $\alpha$ -Protein A antibody. The mature basal bodies were detected  
589 with the YL1/2 monoclonal antibody (green). The kDNA and the nucleus were stained with DAPI  
590 (cyan). B) Immunofluorescence analysis of MiRF172-PTP during different stages of the cell cycle  
591 (1K1N, dK1N, 2K1N, 2K2N) in BSF cells. K = kDNA, N = nucleus, dK = duplicating kDNA.  
592 Localization of MiRF172-PTP (red) and DNA (cyan) were performed as described in A. C)  
593 Immunofluorescence analysis of MiRF172-HA during different stages of the cell cycle (1K1N, dK1N,  
594 2K1N, 2K2N) in PCF cells. Localization of MiRF172-HA (red) represented by maximum intensity  
595 projections from immunofluorescence microscopy image stacks of PCF cells. MiRF172-HA was  
596 detected by the  $\alpha$ -HA antibody. The kDNA and the nucleus were stained as describe in A. PH = phase  
597 contrast. Scale bar = 5  $\mu$ m

598

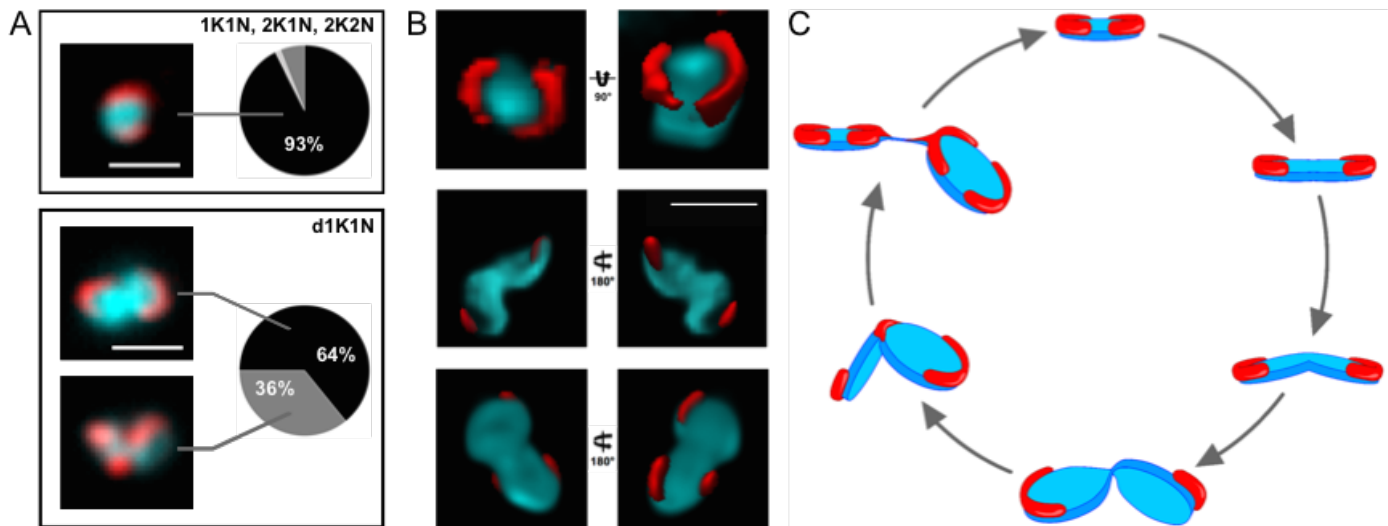

599

600 **Fig. 3 | Analysis of MiRF172 localization during the cell cycle.** A) Quantification of MiRF172-PTP  
601 localization at single or duplicated kDNAs (1K1N, 2K1N, 2K2N) and duplicating kDNAs (d1K1N) in  
602 BSF cells. K = kDNA, dK = duplicating kDNA, N = nucleus. The left side shows representative  
603 immunofluorescence microscopy images depicting the localization of MiRF172-PTP (red) relative to  
604 the kDNA disk (cyan). The pie charts show the localization of MiRF172 in the respective kDNA  
605 replication stage. In 93% of the 1K1N, 2K1N and 2K2N subpopulations, MiRF172 is located at the  
606 antipodal sites. B) 3D-STED immunofluorescence analysis of MiRF172-PTP in *T. brucei* BSF cells.  
607 MiRF172 (red) and kDNA (cyan) 3D projection (surface rendering) from different angles. MiRF172-  
608 PTP was detected by the  $\alpha$ -Protein A antibody and acquired with 3D-STED. The kDNA was stained  
609 with DAPI (cyan) and acquired with confocal microscopy. Pictures were deconvolved with the Huygens  
610 professional software. C) Model of MiRF172 localization during the cell cycle. Depicted is a model of  
611 the different stages of kDNA disk (cyan) replication in *T. brucei* and the localization of MiRF172 (red)  
612 relative to the kDNA. Scale bars = 1  $\mu$ m  
613



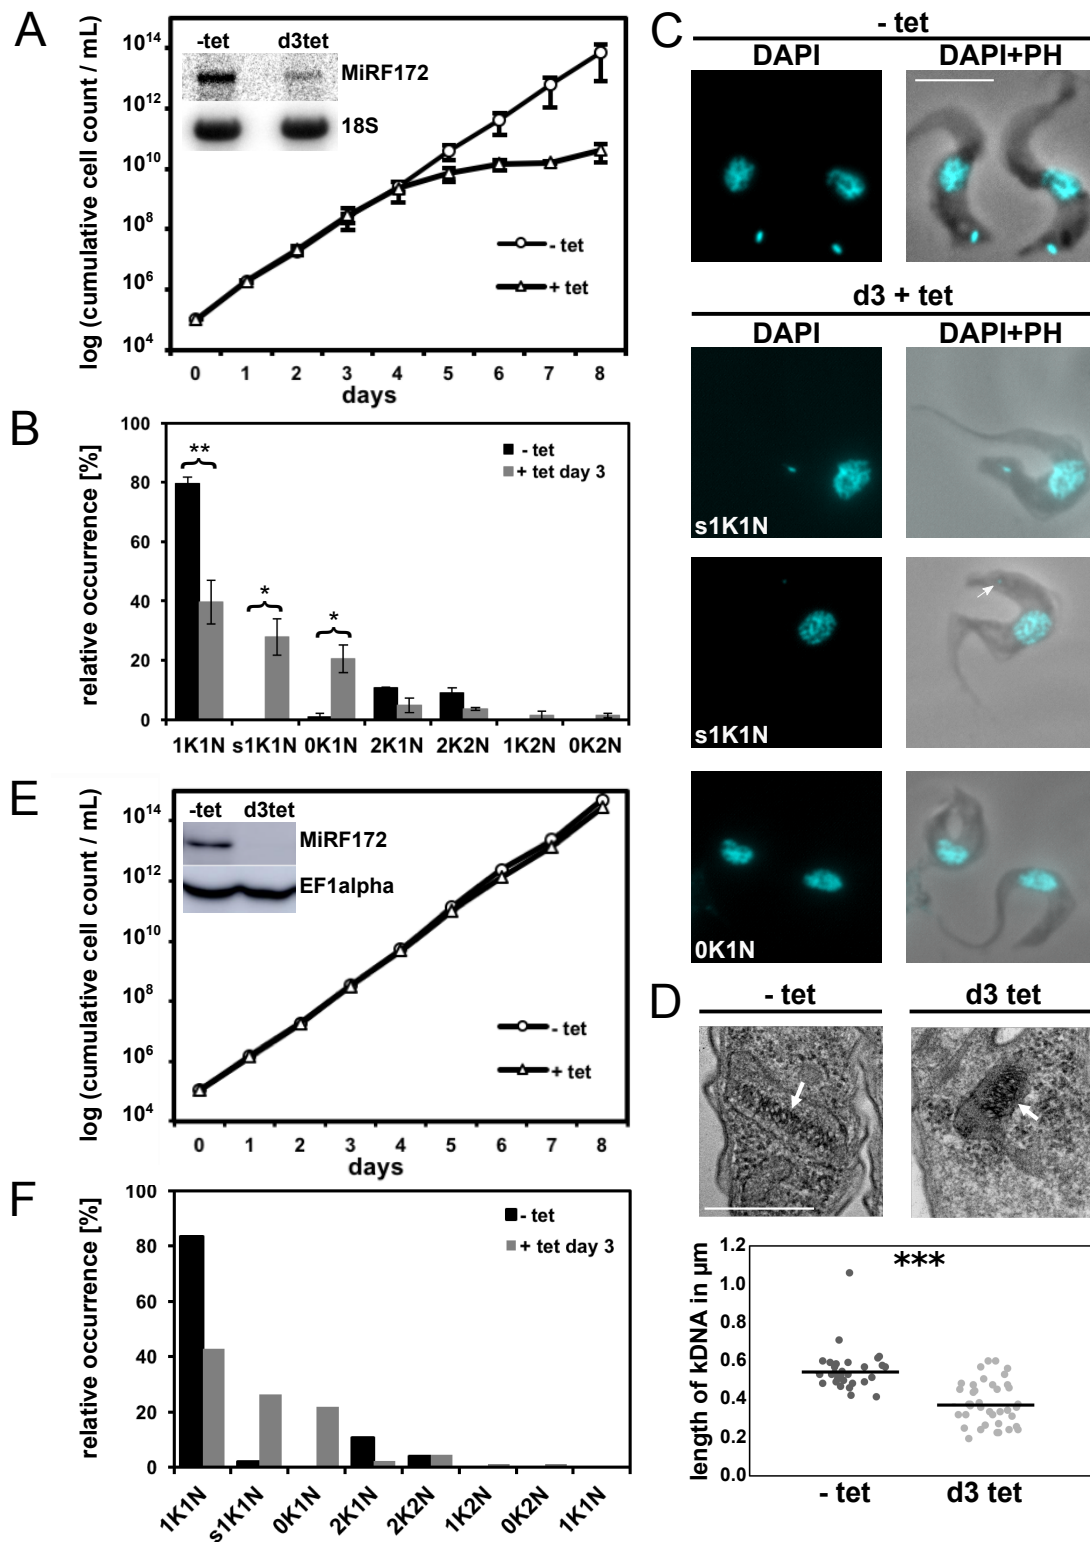

614

615

616 **Fig. 4 | Phenotype upon knockdown of MiRF172 mRNA by RNAi in *T. brucei* BSF cells.** A) Growth  
 617 curve of MiRF172 RNAi *T. brucei* BSF cells. The y-axis shows the cumulative number of cells. Inset  
 618 depicts a northern blot showing ablation of MiRF172 mRNA at day 3 post induction. 18S rRNA serves  
 619 as a loading control. B) Quantification of the relative occurrence of kDNA and nucleus in MiRF172

620 RNAi induced and uninduced cells. K = kDNA, N = nucleus, sK = small kDNA. The y-axis shows the  
621 relative occurrence in the population. Significance of the differences was calculated by two-tailed  
622 unpaired t-test. \* =  $p \leq 0.05$ , \*\* =  $p \leq 0.01$ . C) Representative fluorescence microscopy images of  
623 MiRF172 RNAi BSF cells. The nucleus and the kDNA were stained with DAPI. PH = phase contrast.  
624 Scale bar = 5  $\mu\text{m}$  D) *Upper part*: Representative images of ultra-structures of the kDNA of MiRF172  
625 RNAi cells revealed by TEM. Scale bar = 500 nm. *Lower part*: Length measurements of kDNA ultra-  
626 structures from uninduced and induced (three days) MiRF172 RNAi BSF cells. Y-axis shows length of  
627 kDNAs in microns. Significance of difference in length was calculated by two-tailed unpaired t- test.  
628 \*\*\* =  $p \leq 0.001$  E) Growth curve of MiRF172 RNAi BSF  $\gamma\text{L262P}$  *T. brucei* cells. The inset depicts a  
629 western blot showing ablation of MiRF172-PTP protein at day 3 post induction. EF1alpha serves as a  
630 loading control. F) Quantification of the relative occurrence of kDNA and nucleus in MiRF172 RNAi  
631  $\gamma\text{L262P}$  *T. brucei* cells.  
632

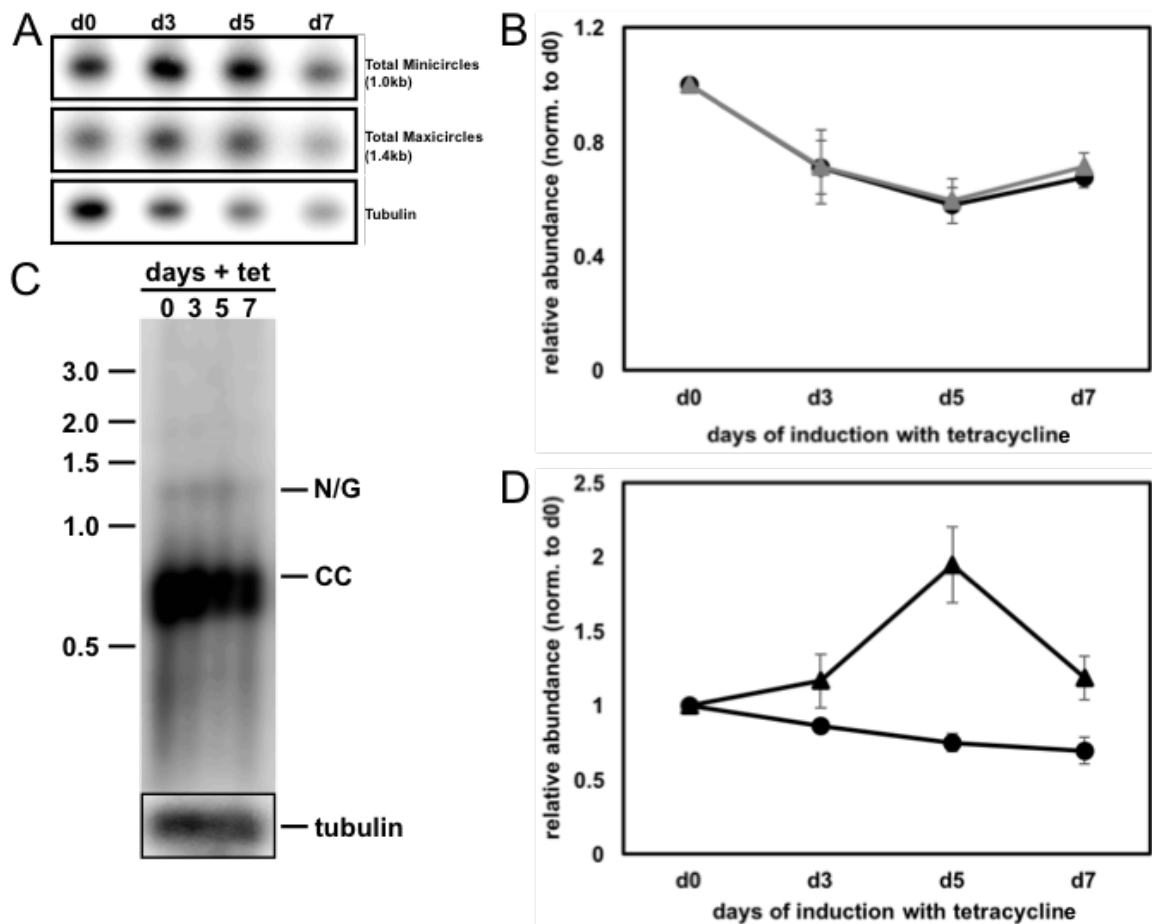

633

634

635 **Fig. 5 | Effect of MiRF172 RNAi on kDNA abundance and free minicircle replication**

636 **intermediates in *T. brucei* BSF cells.** **A)** Detection of mini- and maxicircles by Southern blot. Total

637 DNA (5  $\mu$ g/lane) isolated from either uninduced (d0) or RNAi induced (d3, d5, d7) cells was digested

638 with HindIII / XbaI, Southern blotted, and probed for minicircles (1.0-kb linearized minicircles),

639 maxicircles (a 1.4-kb fragment), and tubulin as a loading control (a 3.6-kb fragment). **B)** Quantification

640 of mini- and maxicircle abundance on Southern blots during MiRF172 depletion. Black circles =

641 minicircles, grey triangles = maxicircles. Abundance ratio of total minicircle or maxicircle relative to

642 the loading control (tubulin), normalized to day 0 of RNAi induction. Minicircles p-value d0 vs. d7 (p

643  $\leq 0.05 = *$ ), maxicircles p-value d0 vs. d7 (p  $\leq 0.05 = *$ ). **C)** Detection of free minicircle replication

644 intermediates by Southern blot. Total DNA (5  $\mu$ g/lane) isolated from either uninduced (d0) or RNAi

645 induced (d3, d5, d7) cells, Southern blotted, and probed for minicircles. Nicked / gapped (N/G) and

646 covalently closed (CC) minicircles are indicated. Tubulin was used as a loading control. **D)**

647 Quantification of CC and N/G minicircles on Southern blot during MiRF172 depletion. Black circles =

648 CC minicircles, black triangles = N/G minicircles. Abundance ratio of minicircles relative to the loading

649 control tubulin and normalized to day 0 of RNAi induction. CC minicircles p-value d0 vs. d5 p  $\leq 0.01$

650 = \*\*, N/G minicircles p-value d0 vs. d5 p  $\leq 0.05 = *$

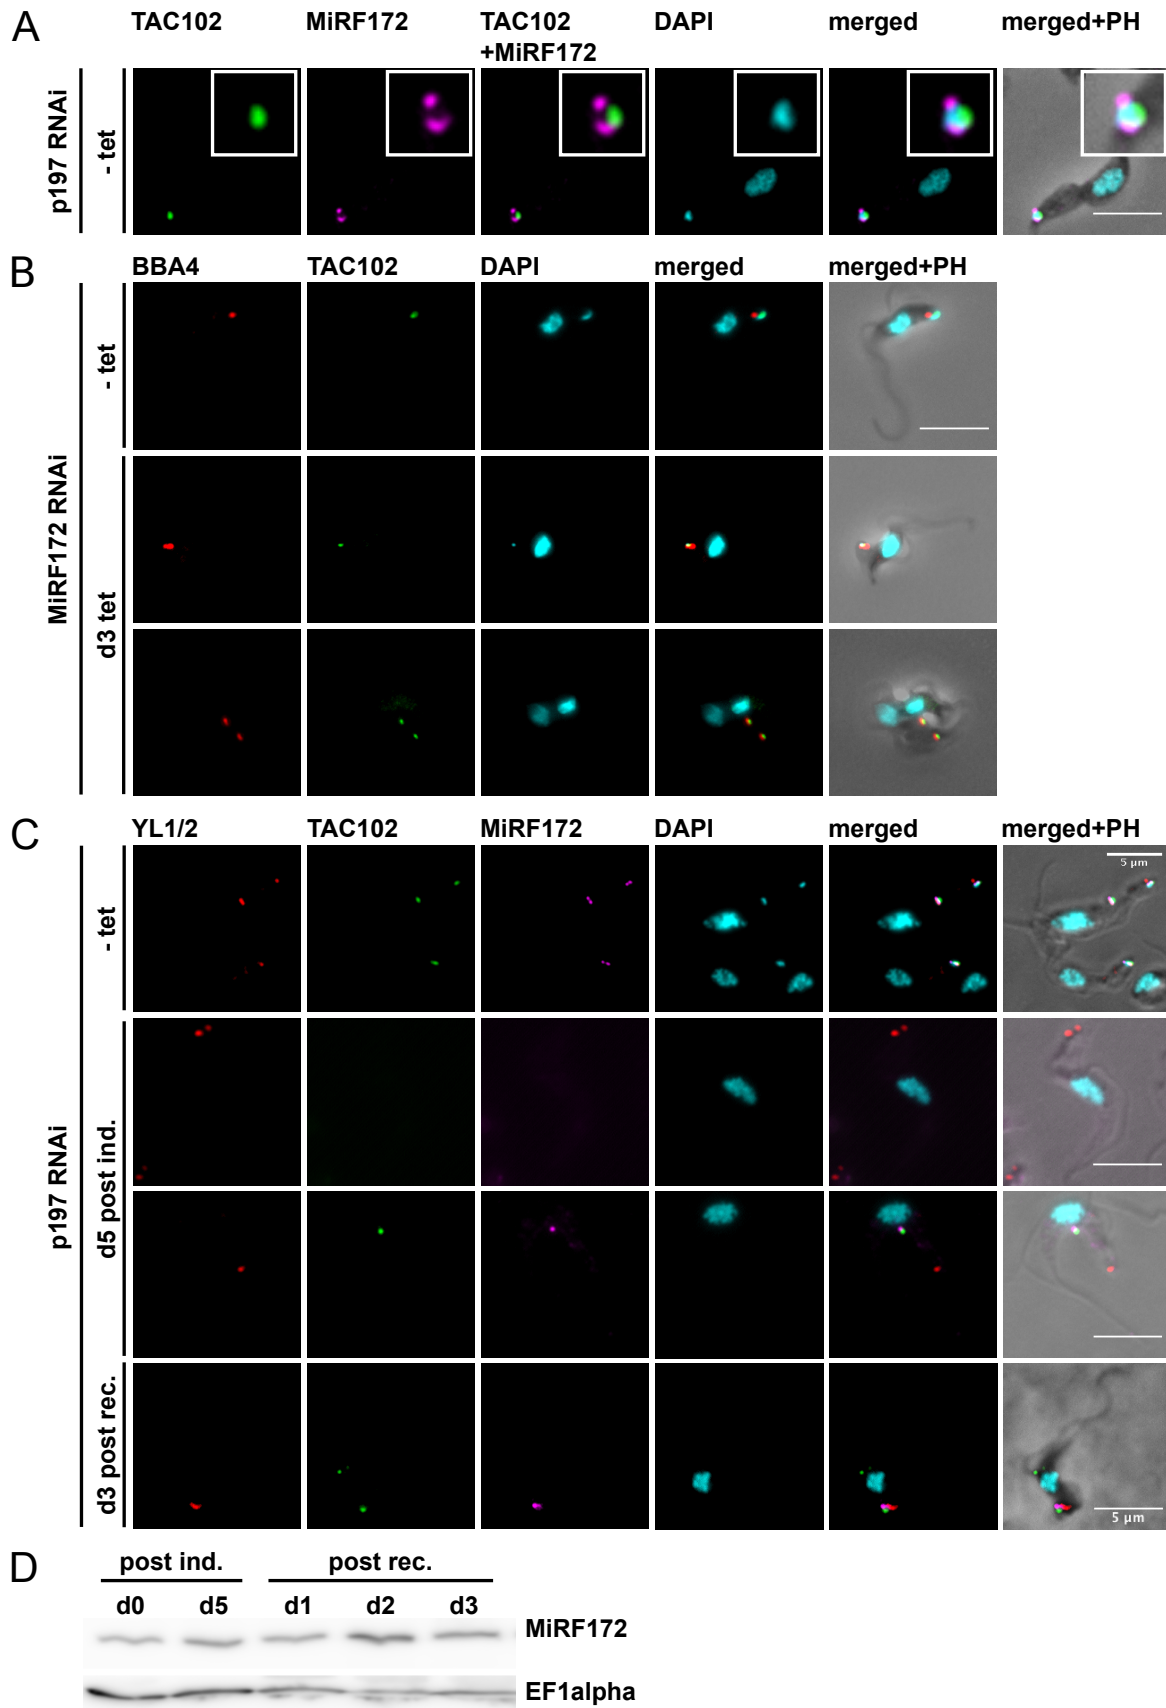

651

652

653 **Fig. 6 | Localization of MiRF172 and TAC102 in cells without kDNA.** **A)** Colocalization of  
654 MiRF172-PTP with TAC102 in  $\gamma$ L262P p197RNAi BSF cells. Localization of MiRF172-PTP  
655 (magenta), TAC102 (green) represented by maximum intensity projections from immunofluorescence  
656 microscopy image stacks of  $\gamma$ L262P p197RNAi BSF *T. brucei* cells. MiRF172-PTP was detected by  
657 the  $\alpha$ -Protein A antibody. TAC102 was detected with the anti-TAC102 monoclonal mouse antibody  
658 (green). The kDNA and the nucleus were stained with DAPI (cyan). **B)** Localization of TAC102 (green)  
659 in MiRF172 RNAi BSF cells. The pictures were obtained under the same conditions as described in A.  
660 The basal bodies (red) were detected by the monoclonal antibody BBA4. **C)** Colocalization of  
661 MiRF172-PTP (magenta) with TAC102 (green) and basal bodies (red) in  $\gamma$ L262P p197RNAi BSF cells.  
662 The pictures were obtained by same conditions as in A. The basal bodies were detected by the YL1/2  
663 monoclonal antibody. **D)** Western blot analysis of  $\gamma$ L262P p197RNAi BSF cells. Total protein isolated  
664 from uninduced cells (d0), cells induced with tetracycline for five days (d5) and cells released from  
665 p197 RNAi at day 1, 2 and 3 post-recovery were used. C-terminal PTP tagged MiRF172 was detected  
666 by a PAP antibody. EF1alpha serves as a loading control. Scale bars = 5  $\mu$ m
